# Supplementary material for: Differential Brain Expression Patterns of microRNAs Related to Olfactory Performance in Honey Bees (Apis mellifera)
Source: MDPI journal article supplement (doi:10.3390/genes14051000), 2023-04-28
Supplement: s1 [file s1]

**Table S3.** RT-qPCR verification of DE miRNAs statistics result

| <b>miRNA name</b>       | <b><i>t</i>-value</b> | <b><i>p</i>-value</b> |
|-------------------------|-----------------------|-----------------------|
| <i>ame</i> -miR-87-3P   | 3.81                  | 0.0034                |
| <i>ame</i> -miR-276-3P  | 2.43                  | 0.036                 |
| <i>ame</i> -miR-12-3P   | 1.84                  | 0.095                 |
| <i>ame</i> -miR-124-5p  | 2.15                  | 0.05                  |
| <i>ame</i> -miR-2796-3p | -1.23                 | 0.25                  |
| <i>ame</i> -miR-2944-3p | 2.17                  | 0.05                  |
| <i>ame</i> -miR-184-3p  | 2.37                  | 0.041                 |
| <i>ame</i> -miR-275-3p  | 1.56                  | 0.14                  |
| <i>ame</i> -miR-965-3p  | 2.17                  | 0.05                  |
| <i>ame</i> -miR-971-3p  | 2.42                  | 0.036                 |
| <i>ame</i> -miR-9a-5p   | 2.26                  | 0.048                 |
| <i>ame</i> -miR-210-3p  | 1.12                  | 0.29                  |
| <i>ame</i> -miR-190-5p  | 2.24                  | 0.049                 |

Note: Comparing the difference between weak and strong olfactory performance. Independent sample *t*-tests with *p*-values  $\leq 0.05$  was considered significantly different.
