# Supplementary material for: Differential Brain Expression Patterns of microRNAs Related to Olfactory Performance in Honey Bees (Apis mellifera)
Source: MDPI journal article supplement (doi:10.3390/genes14051000), 2023-04-28
Supplement: s1 [file s1]

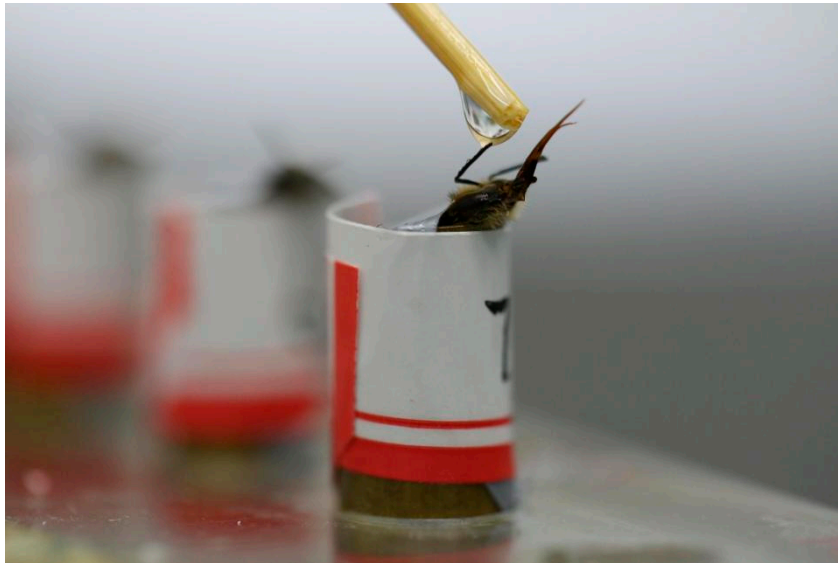

**Figure S1.** Honey bee demonstrating PER after touching 30% sucrose solution with its antenna.

Note: PER of a harnessed *A. mellifera* to antennal stimulation with 30% sucrose solution.
