# Supplementary material for: Differential Brain Expression Patterns of microRNAs Related to Olfactory Performance in Honey Bees (Apis mellifera)
Source: MDPI journal article supplement (doi:10.3390/genes14051000), 2023-04-28
Supplement: s1 [file s1]

**Table S2.** List of Primers used in qPCR

| Primer name              | Primer sequence (5' to 3')                   |      |
|--------------------------|----------------------------------------------|------|
| ame-miR-87-3p-F          | GCGCGCGGTGAGCAAAGTT                          |      |
| ame-miR-87-3p-Loop       | CTCAACTGGTGTCGTGGAGTCGGCAATTCAGTTGAGACACCTGA |      |
| ame-miR-124-3p-F         | GCGCGCGTAAGGCACGCGGTGA                       |      |
| ame-miR-124-3p-Loop      | CTCAACTGGTGTCGTGGAGTCGGCAATTCAGTTGAGCTTGGCAT |      |
| ame-miR-275-3p-F         | GCGCGCGTCAGGTACCTGAAGT                       |      |
| ame-miR-275-3p-Loop      | CTCAACTGGTGTCGTGGAGTCGGCAATTCAGTTGAGCGCGCGCT |      |
| ame-miR-190-5p-F         | GCGCGCGAGATATGTTTGATATTCT                    |      |
| ame-miR-190-5p-Loop      | CTCAACTGGTGTCGTGGAGTCGGCAATTCAGTTGAGAACAACCA |      |
| ame-miR-2944-3p-F        | GCGCGCGTATCACAGCAGTAGT                       |      |
| ame-miR-2944-3p-Loop     | CTCAACTGGTGTCGTGGAGTCGGCAATTCAGTTGAGACCAGGTA |      |
| ame-miR-9a-5p-F          | GCGCGCGTCTTTGGTTATCTAG                       |      |
| ame-miR-9a-5p-Loop       | CTCAACTGGTGTCGTGGAGTCGGCAATTCAGTTGAGTCATACAG |      |
| ame-miR-12-5p-F          | GCGCGCGTGAGTATTACATCAG                       |      |
| ame-miR-12-5p-Loop       | CTCAACTGGTGTCGTGGAGTCGGCAATTCAGTTGAGACCAGTAC |      |
| ame-miR-6062-3p-F        | GCGCGCGTACGATATTGGTAT                        |      |
| ame-miR-6062-3p-Loop     | CTCAACTGGTGTCGTGGAGTCGGCAATTCAGTTGAGTGTCTTAA |      |
| ame-miR-965-3p-F         | GCGCGCGTAAGCGTATAGCTT                        |      |
| ame-miR-965-3p-Loop      | CTCAACTGGTGTCGTGGAGTCGGCAATTCAGTTGAGAAGGGAAA |      |
| me-miR-971-3p-F          | GCGCGCGTTGGTGTCTACCTT                        |      |
| me-miR-971-3p-Loop       | CTCAACTGGTGTCGTGGAGTCGGCAATTCAGTTGAGCTCACTGT |      |
| ame-miR-184-3p-F         | GCGCGCGTGGACGGAGAACTG                        |      |
| ame-miR-184-3p-Loop      | CTCAACTGGTGTCGTGGAGTCGGCAATTCAGTTGAGGCCCTTAT |      |
| ame-miR-276-3p-F         | GCGCGCGTAGGAACTTCATAC                        |      |
| ame-miR-276-3p-Loop      | CTCAACTGGTGTCGTGGAGTCGGCAATTCAGTTGAGAGAGCACG |      |
| ame-miR-2796-3p-F        | GCGCGCGGTAGGCCGGCGGAAA                       |      |
| ame-miR-2796-3p-Loop     | CTCAACTGGTGTCGTGGAGTCGGCAATTCAGTTGAGGCAAGTAG |      |
| ame-miR-210-3p-F         | GCGCGCGTTGTGCGTGTGAC                         |      |
| ame-miR-210-3p-Loop      | CTCAACTGGTGTCGTGGAGTCGGCAATTCAGTTGAGTAGCCGCT |      |
| mQ Primer R              | GTCGTATCCAGTGCAGGGTCCGAGGTATTCGCACTGGATACGAC |      |
| F-RpL32 (Reference gene) | CGATCTCGCCGCAGTAAAC                          |      |
| F-U6 (Reference gene)    | GTTAGGCTTTGACGATTTTCG                        | [58] |
| R-U6                     | GGCATTCTCCACCAGGTA                           |      |

Note: All these primers were designed in this study for the reference genes; the primers were used from published papers.
