# Supplementary material for: Differential Brain Expression Patterns of microRNAs Related to Olfactory Performance in Honey Bees (Apis mellifera)
Source: MDPI journal article supplement (doi:10.3390/genes14051000), 2023-04-28
Supplement: s1 [file s1]

**Table S1.** The most enriched pathway terms

| Term                                    | Sample number | Background number | <i>p</i> -value | Corrected <i>p</i> -value | Uni-Genes               | KO                                  | Entrez ID               |
|-----------------------------------------|---------------|-------------------|-----------------|---------------------------|-------------------------|-------------------------------------|-------------------------|
| Neuroactive ligand-receptor interaction | 2             | 32                | 0.0098          | 0.13                      | 412818 406124           | ame:412818 ame:406124               | 412818 406124           |
| Oxidative phosphorylation               | 2             | 86                | 0.058           | 0.2                       | 413891 412810           | ame:413891 ame:412810               | 413891 412810           |
| Fructose and mannose metabolism         | 1             | 17                | 0.078           | 0.2                       | 725455                  | ame:725455                          | 725455                  |
| Terpenoid backbone biosynthesis         | 1             | 17                | 0.078           | 0.2                       | 551463                  | ame:551463                          | 551463                  |
| Pentose phosphate pathway               | 1             | 18                | 0.082           | 0.2                       | 725455                  | ame:725455                          | 725455                  |
| Phototransduction - fly                 | 1             | 24                | 0.11            | 0.2                       | 413224                  | ame:413224                          | 413224                  |
| Pyruvate metabolism                     | 1             | 25                | 0.11            | 0.2                       | 724904                  | ame:724904                          | 724904                  |
| Glycolysis / Gluconeogenesis            | 1             | 29                | 0.13            | 0.2                       | 725455                  | ame:725455                          | 725455                  |
| Biosynthesis of amino acids             | 1             | 47                | 0.21            | 0.27                      | 725455                  | ame:725455                          | 725455                  |
| Phagosome                               | 1             | 51                | 0.21            | 0.27                      | 412810                  | ame:412810                          | 412810                  |
| Lysosome                                | 1             | 57                | 0.23            | 0.27                      | 412810                  | ame:412810                          | 412810                  |
| Carbon metabolism                       | 1             | 71                | 0.28            | 0.3                       | 725455                  | ame:725455                          | 725455                  |
| Metabolic pathways                      | 3             | 637               | 0.57            | 0.57                      | 725455 413891<br>412810 | ame:725455 ame:413891<br>ame:412810 | 725455 413891<br>412810 |

Note: Statistic method hypergeometric test /Fisher's exact test with *p*-value < 0.05 was considered significantly enriched and false discovery rate (FDR) correction method Benjamini and Hochberg was to detect the most enrichments pathway terms.
