# Supplementary material for: Differential Brain Expression Patterns of microRNAs Related to Olfactory Performance in Honey Bees (Apis mellifera)
Source: Genes (Basel). 2023 Apr 28;14(5):1000. doi: 10.3390/genes14051000 (PMC10217982; doi:10.3390/genes14051000)
Supplement: Supplementary file 1 [file genes-14-01000-s001.zip]

Archive with 5 entries (5 files):
- Figure S1. Honey bee demonstrating PER after touching 30% sucrose solution with its antenna.pdf
- Figure S2. Scatter plot for KEGG enrichment results.pdf
- Table S1.The most enriched pathway terms.pdf
- Table S2. Primer sequences used for RT-qPCR.pdf
- Table S3. RT-qPCR verification of DEmiRNAs statistics result.pdf
